# Supplementary material for: Down-/up-conversion luminescence nanocomposites for dual-modal cell imaging
Source: Royal Society of Chemistry journal article supplement (doi:10.1039/c2tb00469k), 2013-01-01
Supplement: c2tb00469k.pdf [file c2tb00469k.pdf]

## Electronic Supplementary Information

### Down/Up- Conversion Luminescence Nanocomposites for Dual-modal Cell Imaging

Mingyue An, Jiabin Cui, Qian He and Leyu Wang\*

State Key Laboratory of Chemical Resource Engineering, School of Science, Beijing University  
of Chemical Technology, Beijing 100029, China

\*To whom correspondence should be addressed. E-mail: [lywang@mail.buct.edu.cn](mailto:lywang@mail.buct.edu.cn)

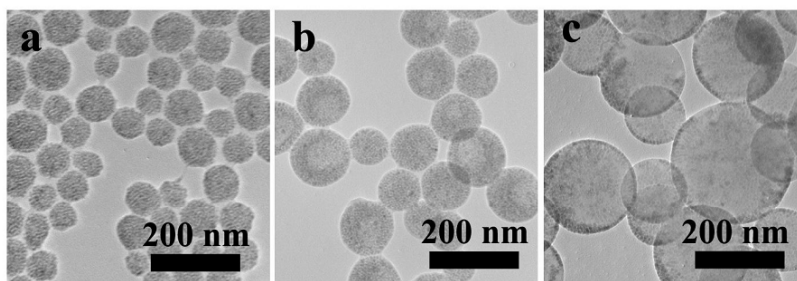

**Figure S1.** TEM images of the obtained  $\text{Fe}_3\text{O}_4$  nanocomposites by using different amounts of monomers. The volume of the monomers (emulsion B): a) 700, b) 450, c) 350  $\mu\text{L}$ ; Emulsion B was prepared as follows: styrene (0.3 mL), EGDMA (70  $\mu\text{L}$ ) and MAA (20  $\mu\text{L}$ ) were mixed with SDS solution (10 mL, 1 mg/mL) under the ultrasonication for 5 min.

As shown in Figure S1, we obtained the  $\text{Fe}_3\text{O}_4$  nanocomposites with the diameter from  $\sim 75$  nm to  $\sim 180$  nm by adjusting the dosage of monomers. By fixing the amount of hydrophobic  $\text{Fe}_3\text{O}_4$  NPs, the average size of the as-prepared nanocomposites became larger and larger with the increase of monomers.

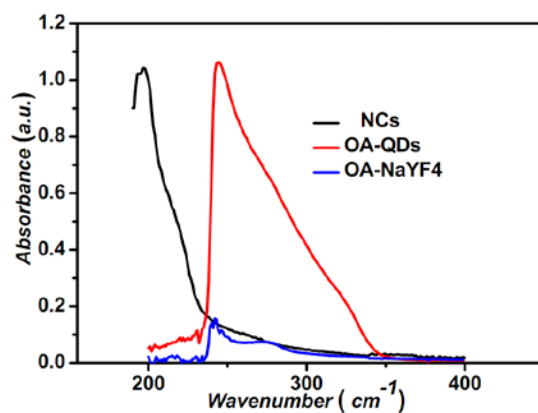

**Figure S2.** UV-Vis absorption spectra of the DC/UC nanocomposites in water (black line), the hydrophobic  $\text{ZnS:Mn}^{2+}$  QDs in chloroform (red line) and the hydrophobic  $\text{NaYF}_4\text{:Yb}^{3+}/\text{Er}^{3+}$  UCNPs in chloroform (blue line). OA-QDs: oleic acid coated QDs; OA- $\text{NaYF}_4$ : oleic acid coated UCNPs. As shown in these absorption spectra, no absorption can be observed over 350 nm.

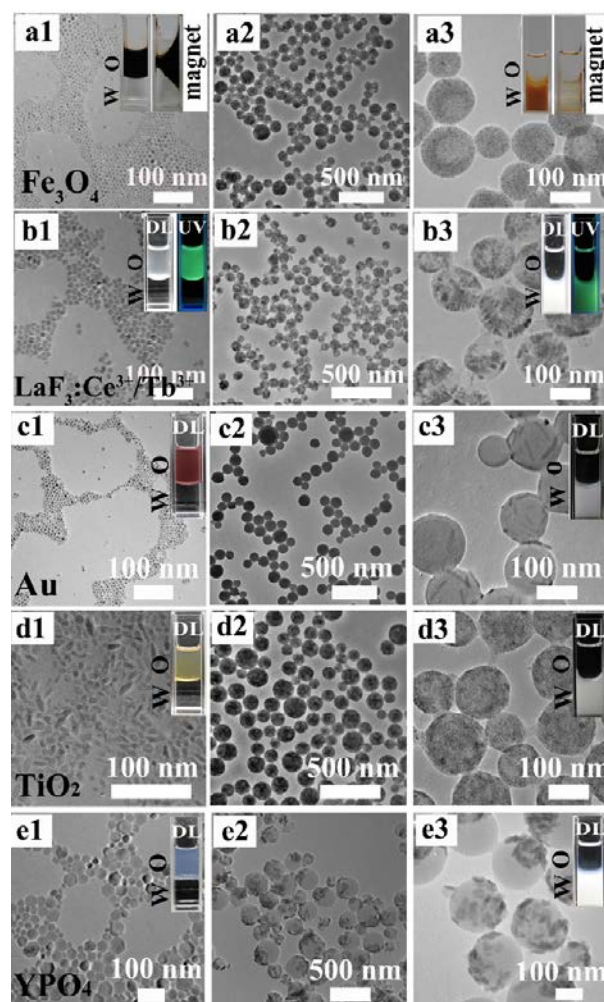

**Figure S3.** TEM images of hydrophobic NPs (a1, b1, c1, d1, e1) and hydrophilic NCs with low (a2, b2, c2, d2, e2) and high (a3, b3, c3, d3, e3) magnification. (a1-a3):  $\text{Fe}_3\text{O}_4$ ; (b1-b3):  $\text{LaF}_3:\text{Ce}^{3+}/\text{Tb}^{3+}$ ; (c1-c3): Au; (d1-d3):  $\text{TiO}_2$ ; (e1-e3):  $\text{YPO}_4$ . Insets: daylight (DL) photographs of NPs dispersed in cyclohexane (a1, b1, c1, d1, e1) and NCs dispersed in water (a3, b3, c3, d3, e3).

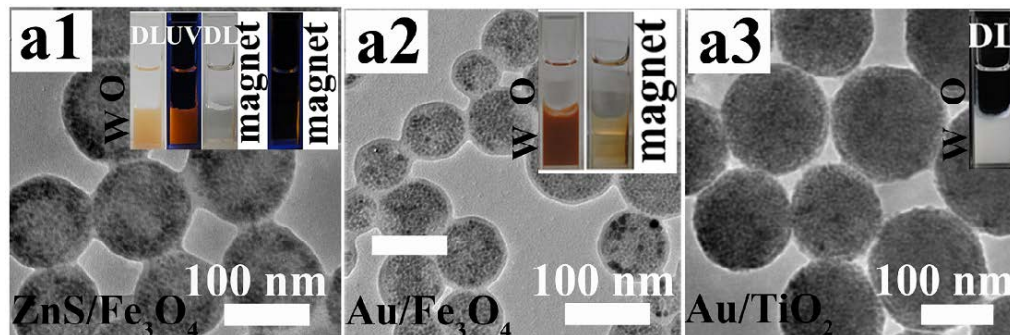

**Figure S4.** TEM images of ZnS:Mn<sup>2+</sup>-Fe<sub>3</sub>O<sub>4</sub> (a1), Au-Fe<sub>3</sub>O<sub>4</sub> (a2), and Au-TiO<sub>2</sub> (a3) nanocomposites. Insets: daylight (DL) and luminescence photographs of the nanocomposites dispersed in water. W and O represent water and oil (cyclohexane), respectively.
